# Supplementary material for: Tumor growth of neurofibromin-deficient cells is driven by decreased respiration and hampered by NAD+ and SIRT3
Source: PubMed Central journal article supplement (PMC9525706; doi:10.1038/s41418-022-00991-4), 2022-04-07
Supplement: 41418_2022_991_MOESM8_ESM.pdf [file 41418_2022_991_MOESM8_ESM.pdf]

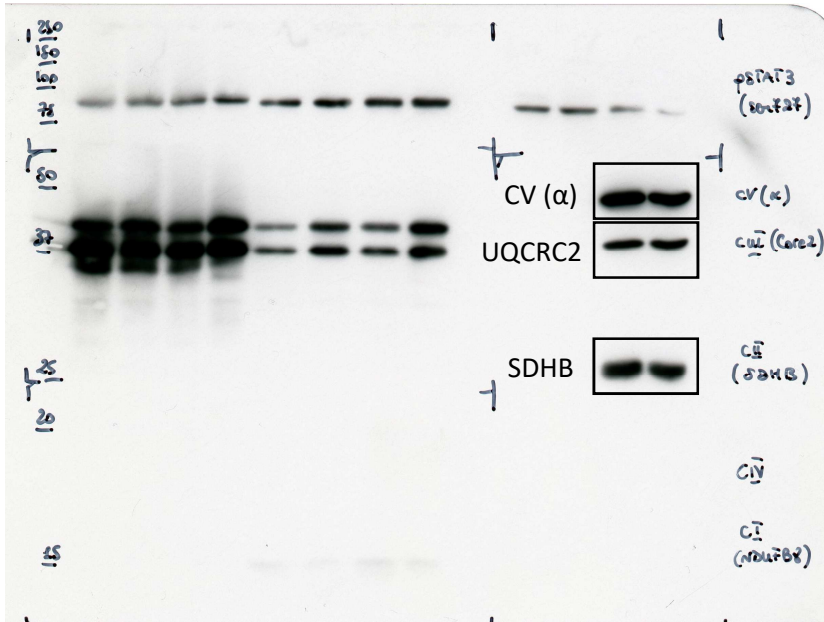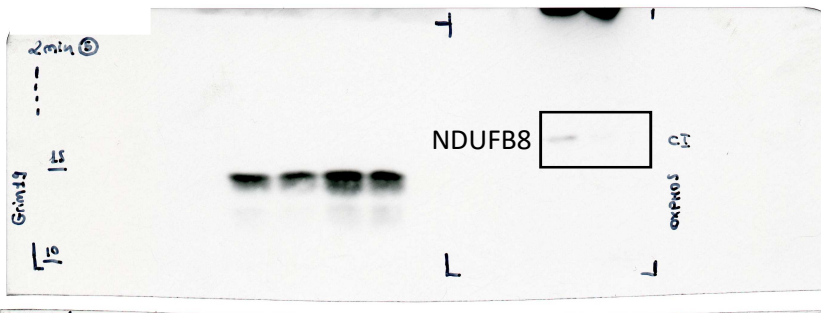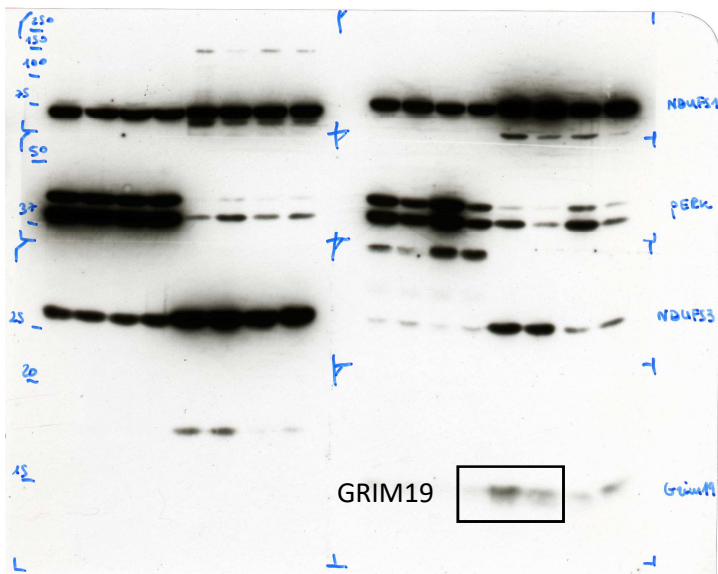

**Fig. 1A**

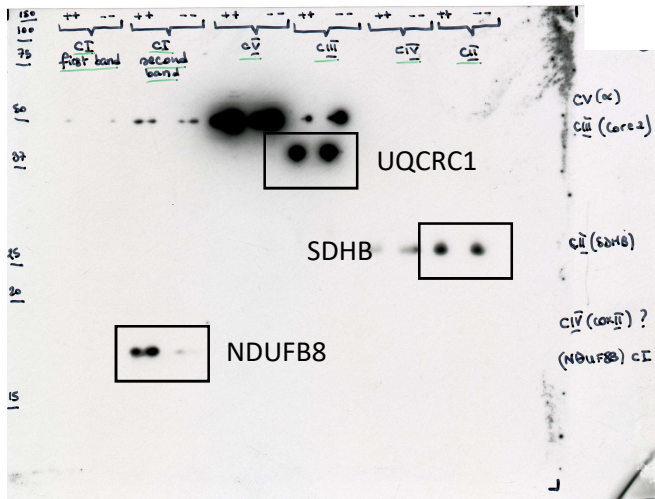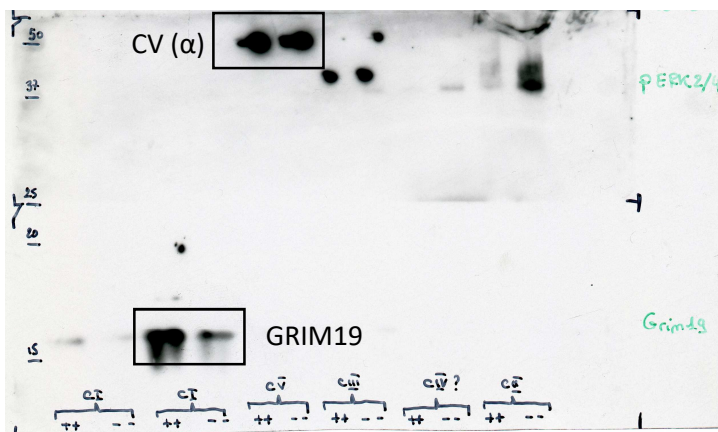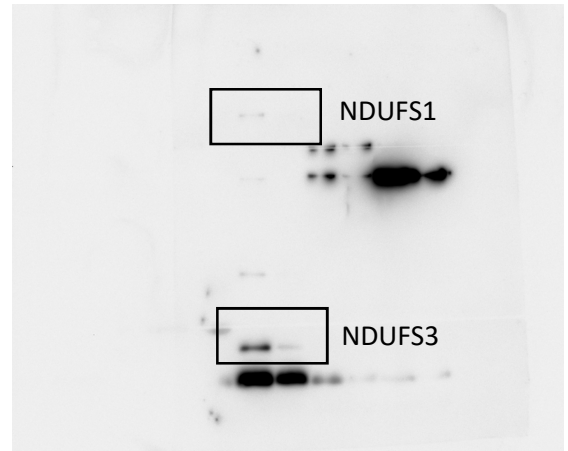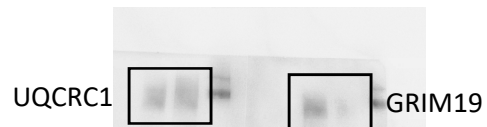

Fig. 1B, D

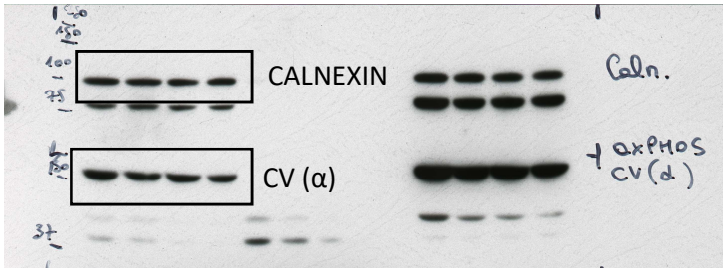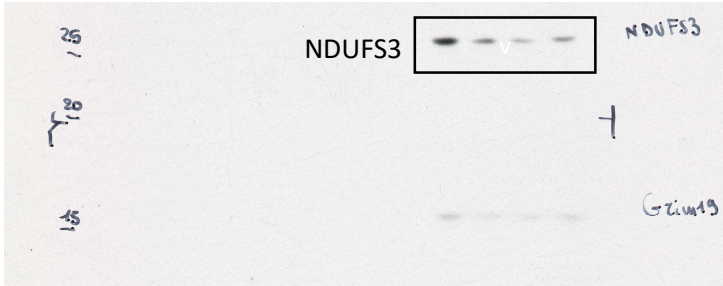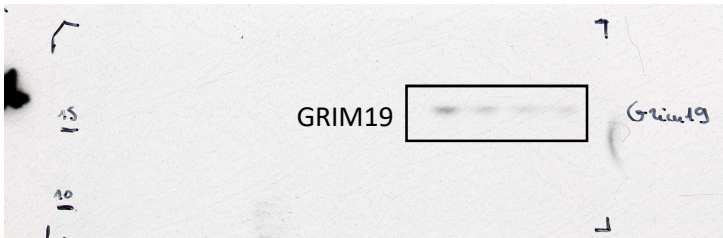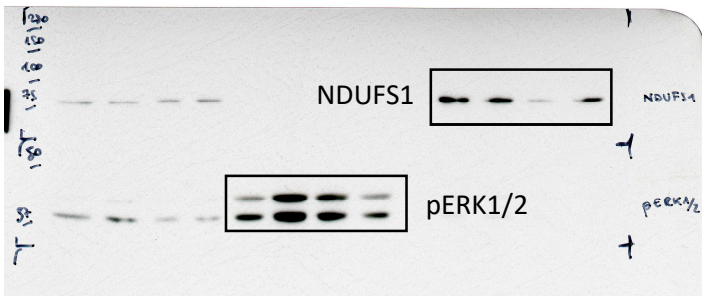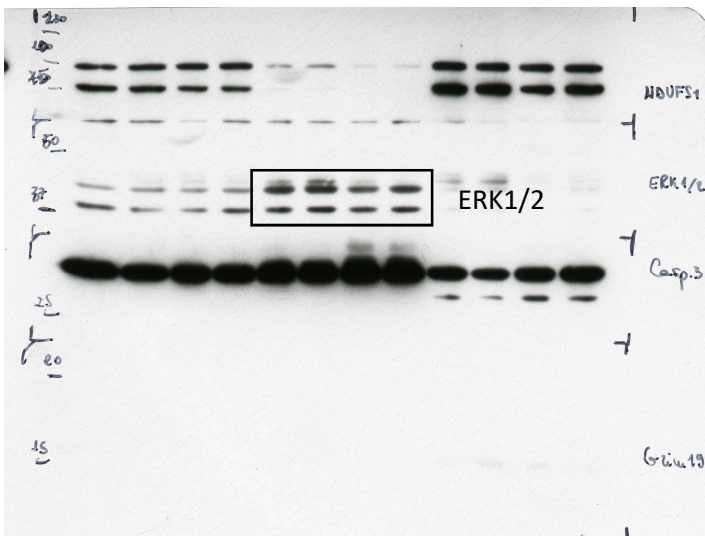

**Fig. 2A**

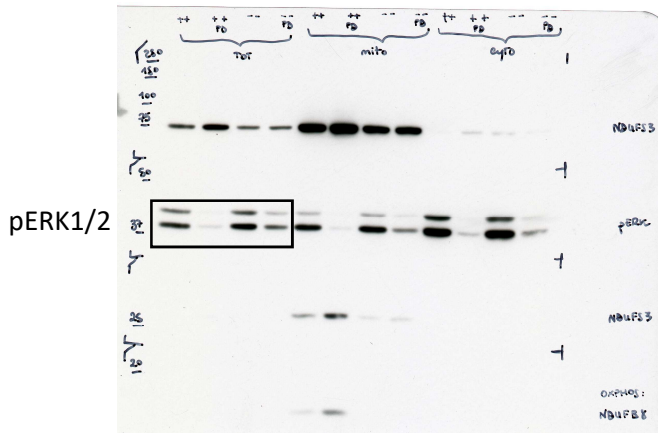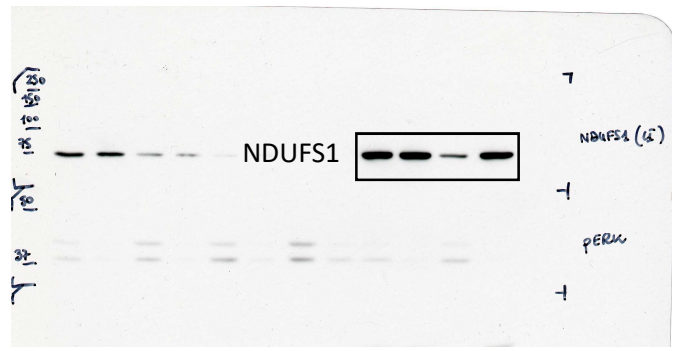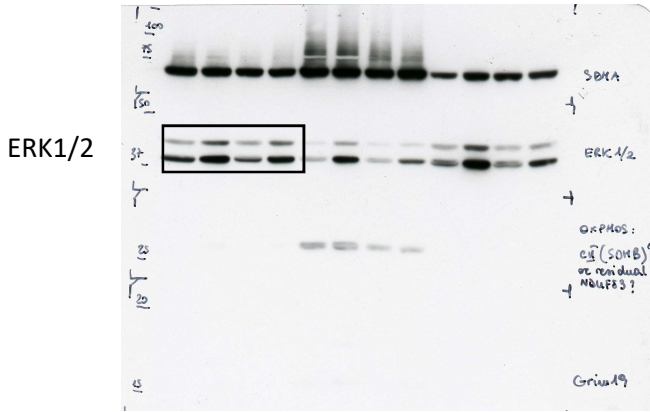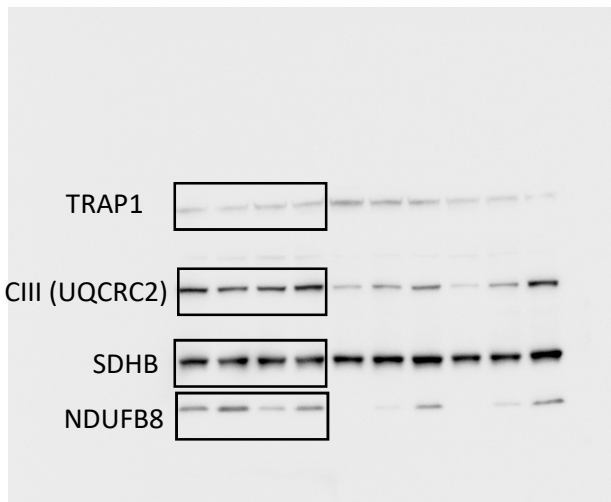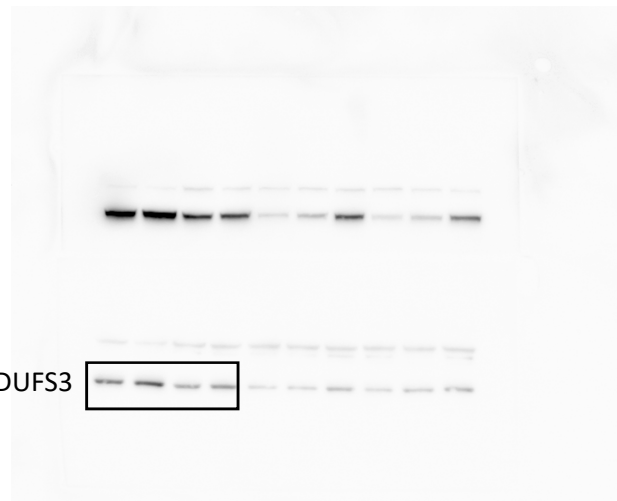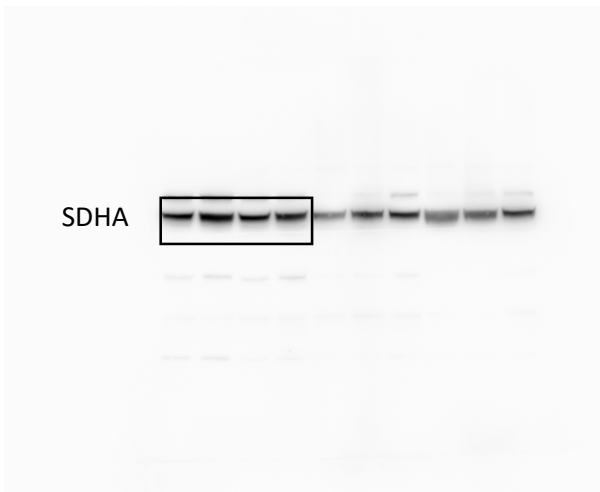

**Fig. 2B**

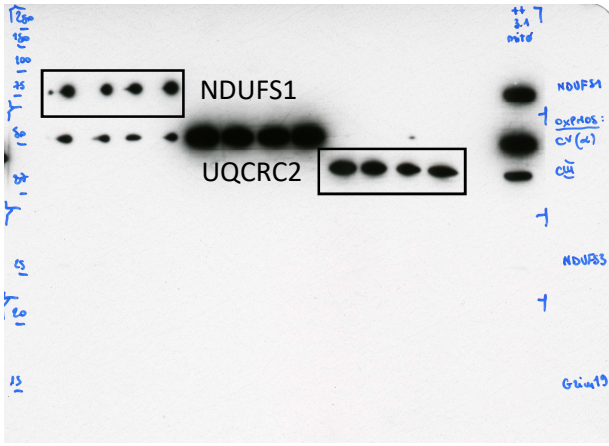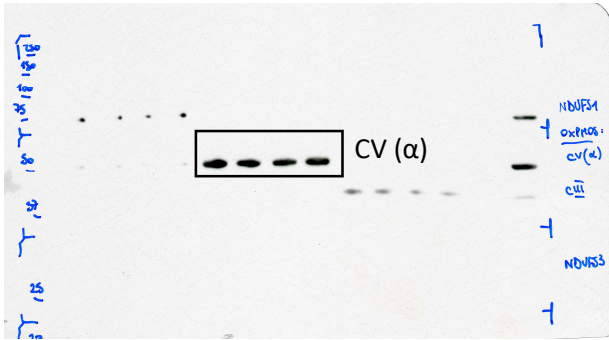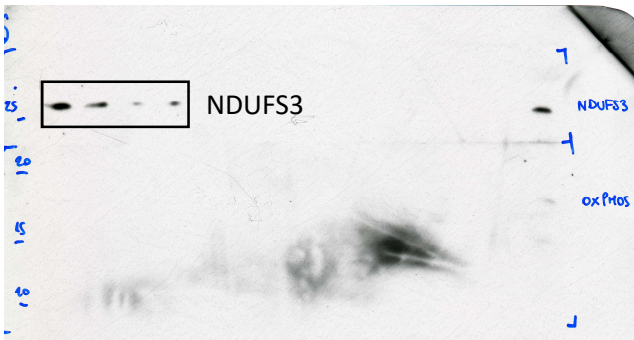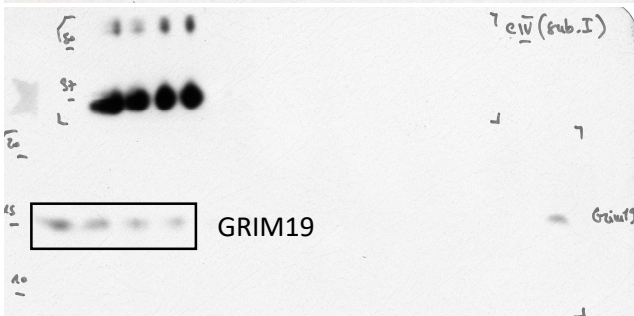

**Fig. 2D**

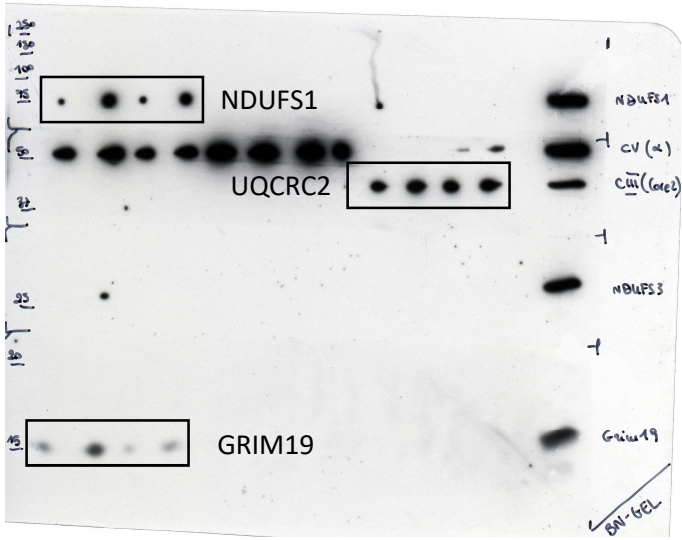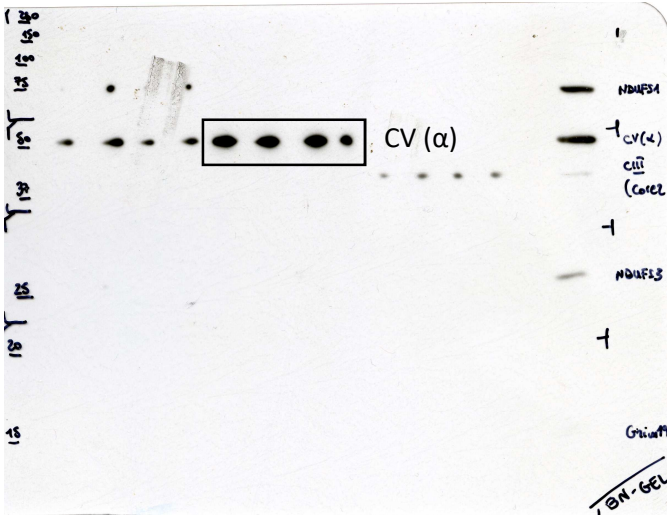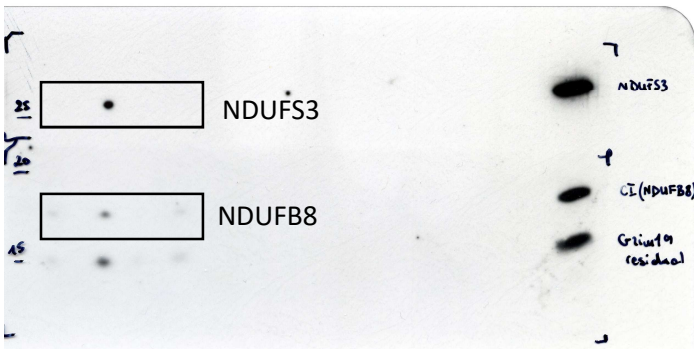

**Fig. 2E**

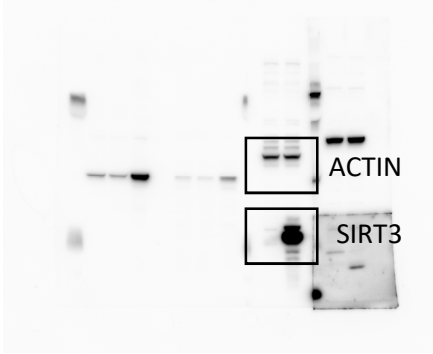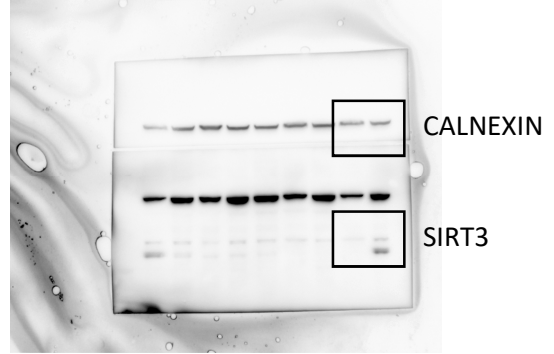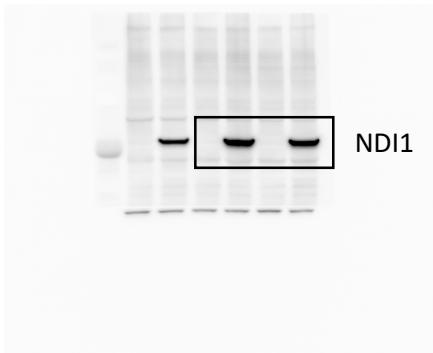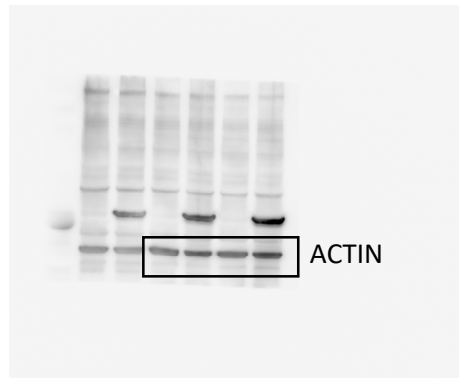

**Fig. 4**

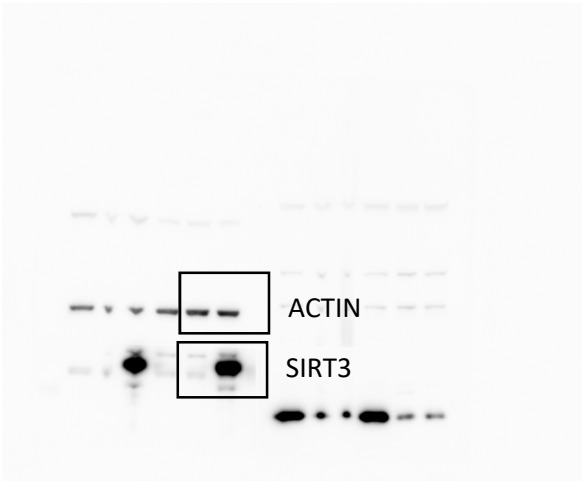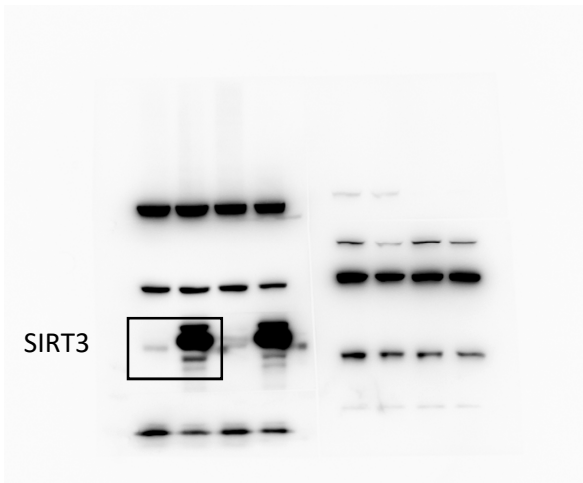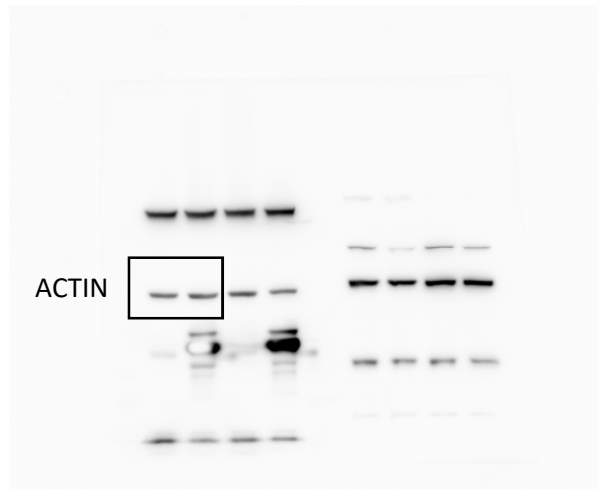

**Fig. 5**



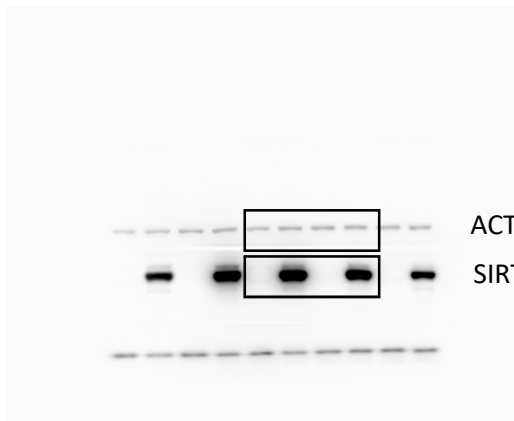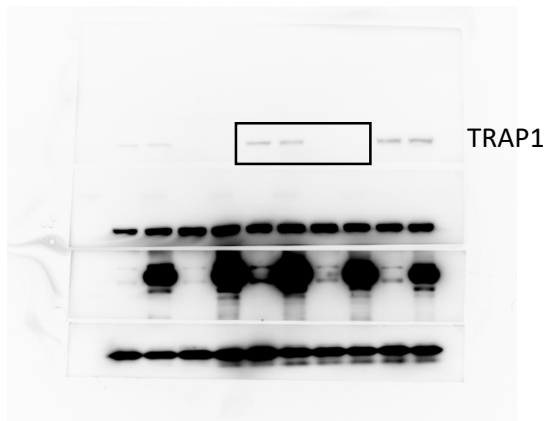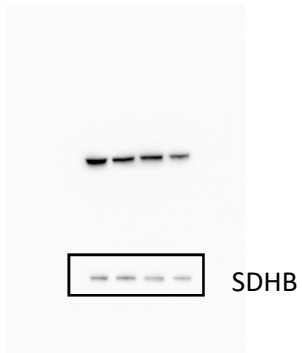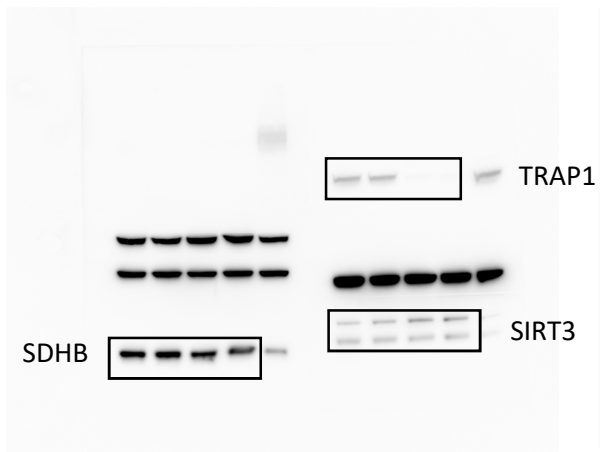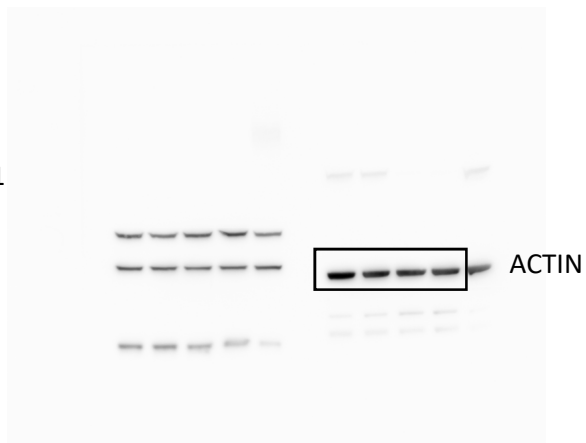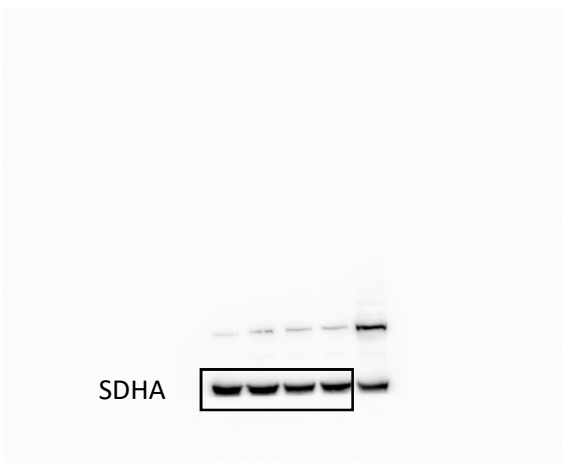

**Fig. 6**

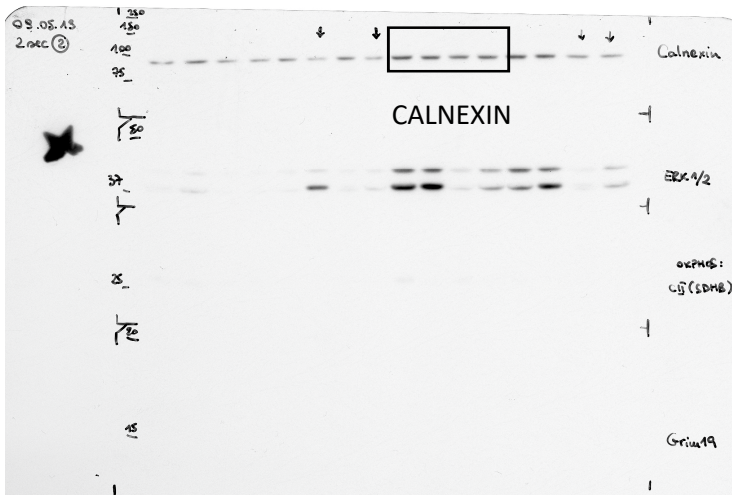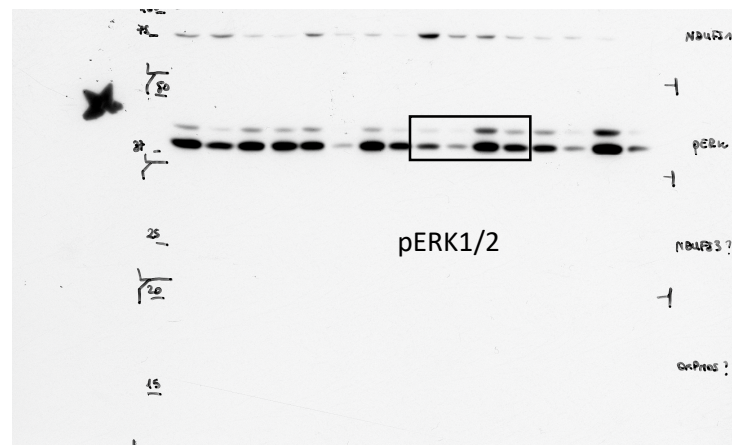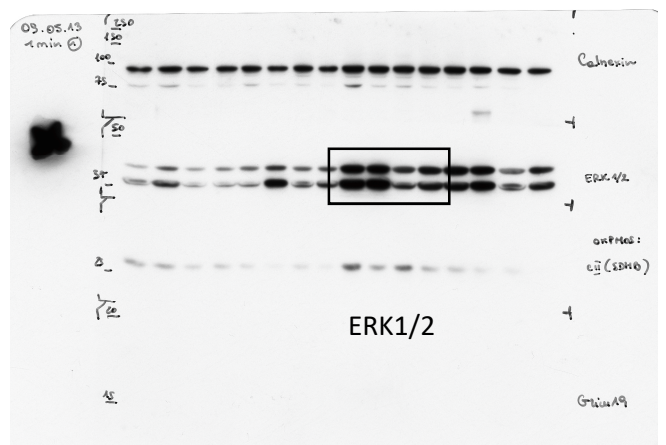

Supplementary Fig. 1B

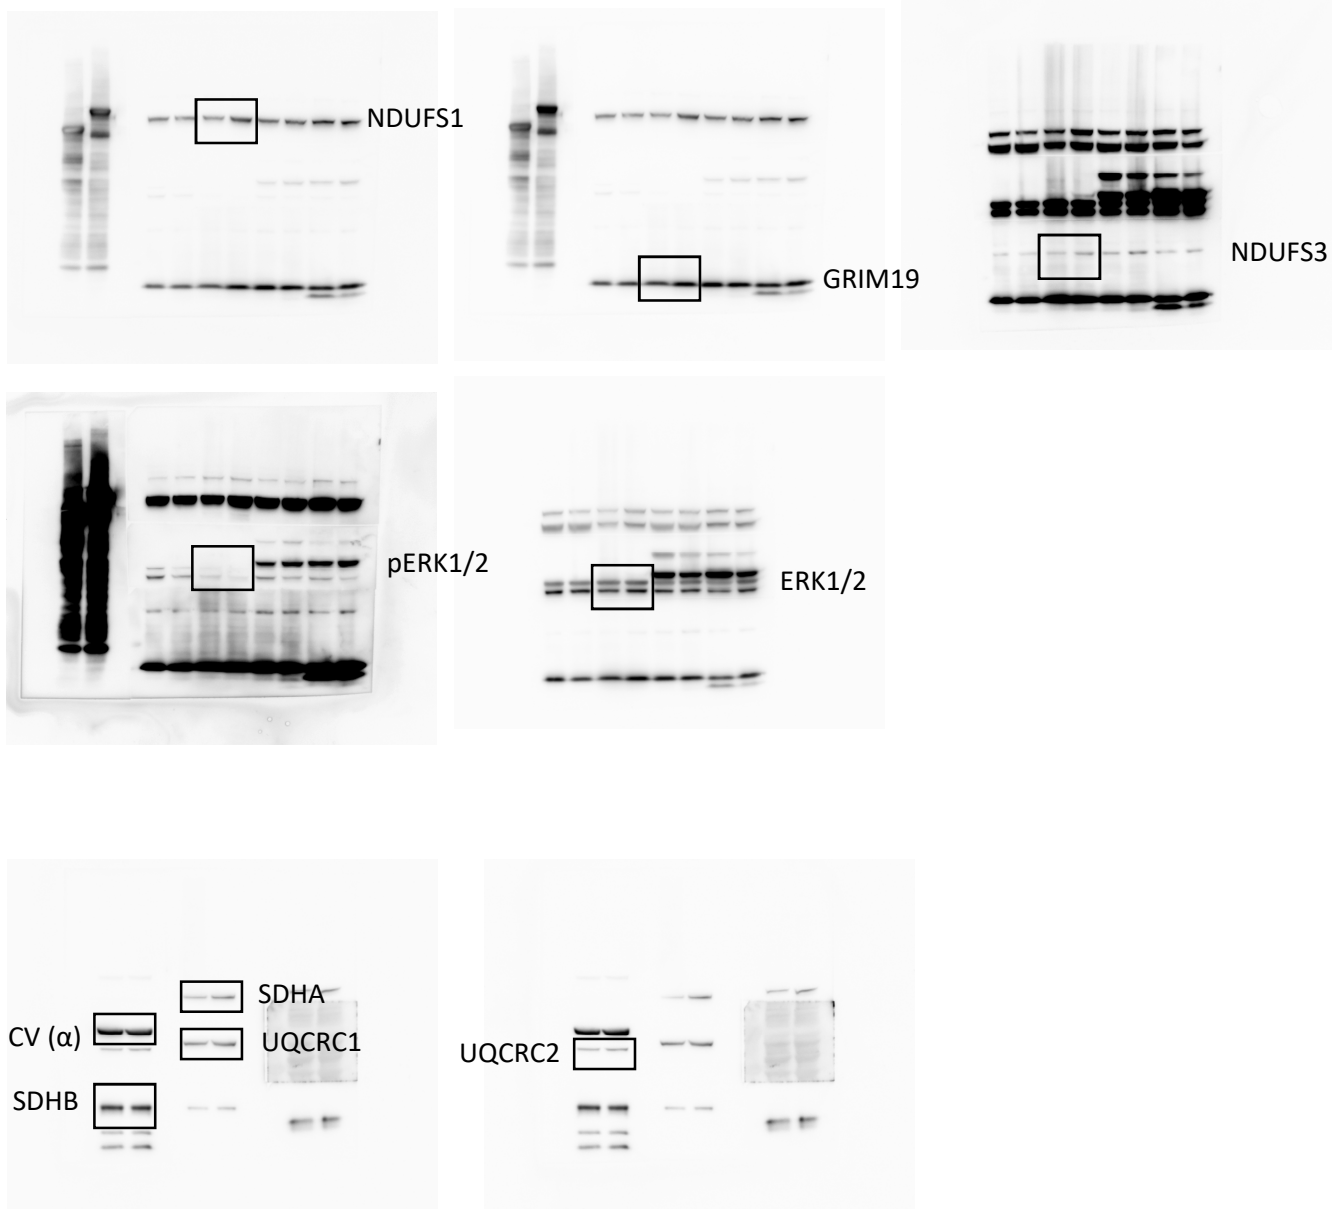

**Supplementary Fig. 1C**

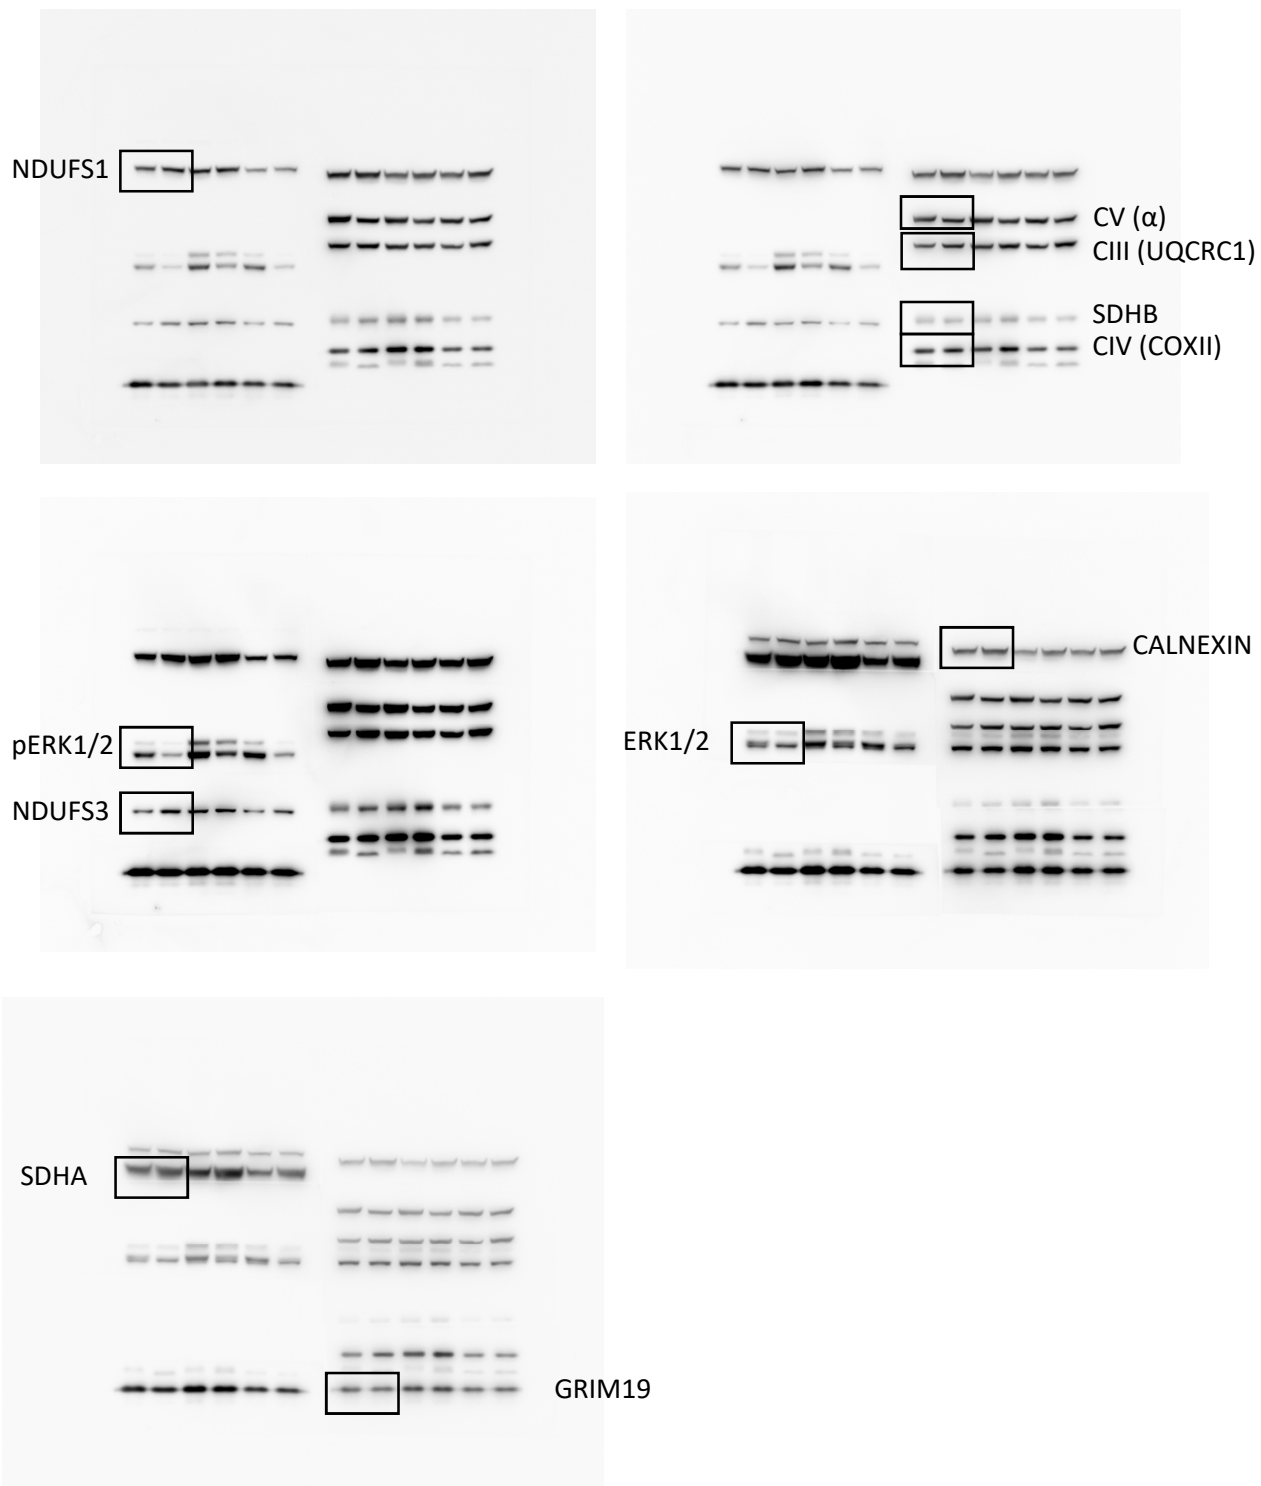

**Supplementary Fig. 1D**

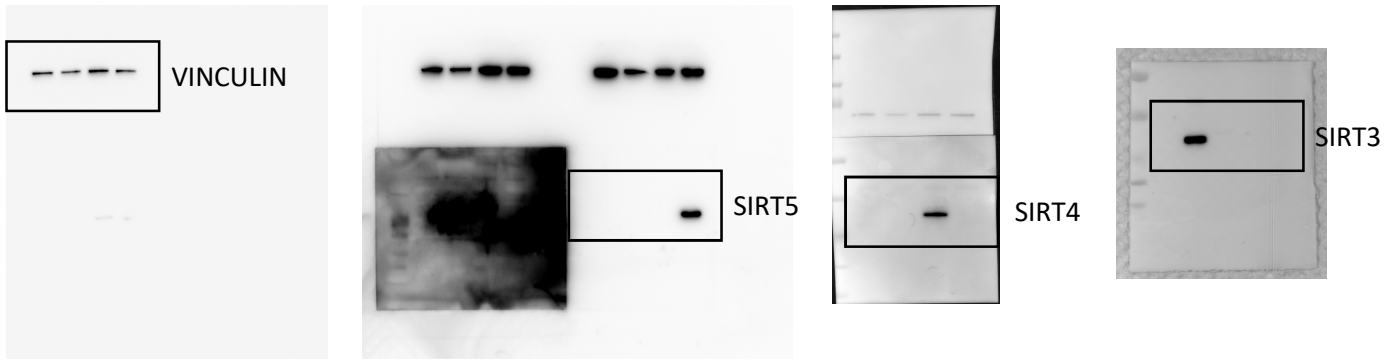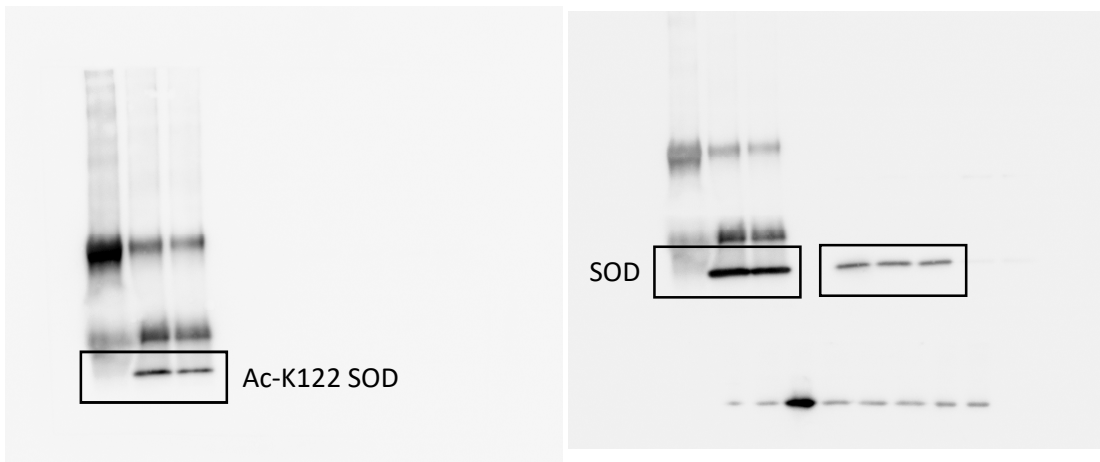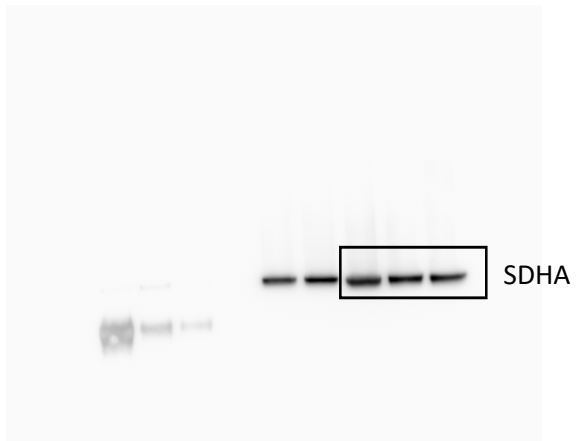

**Supplementary Fig. 4D, E**

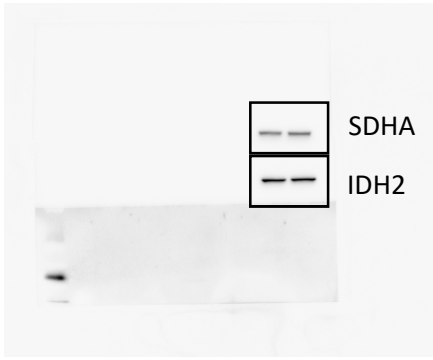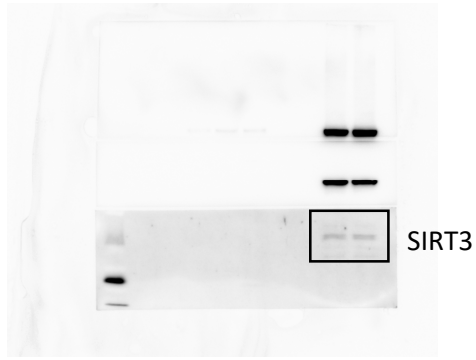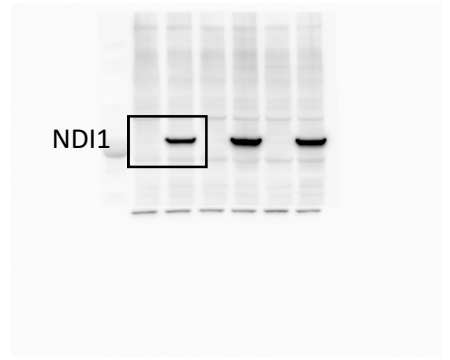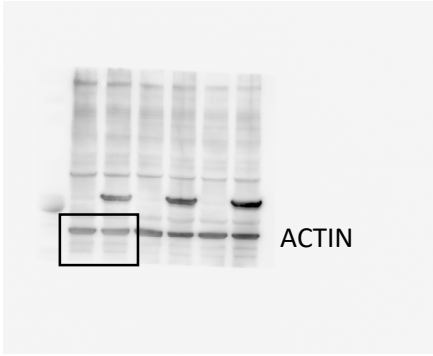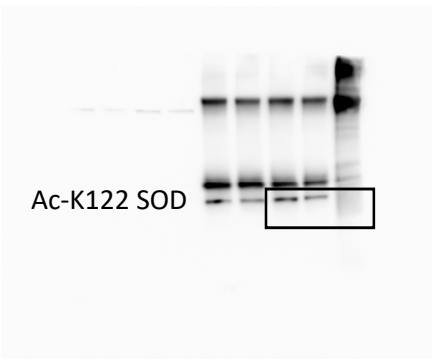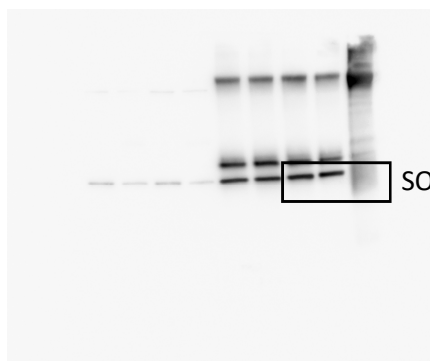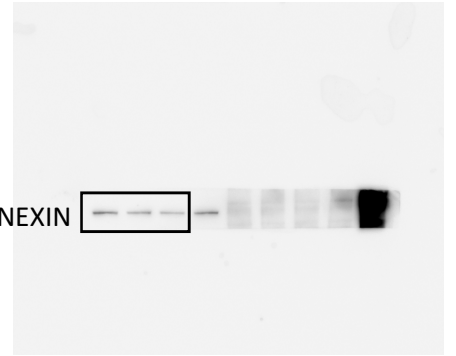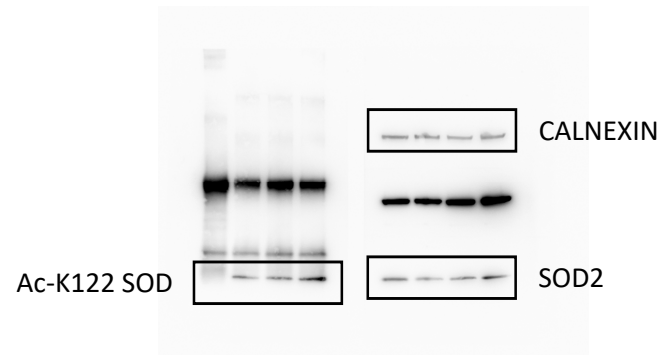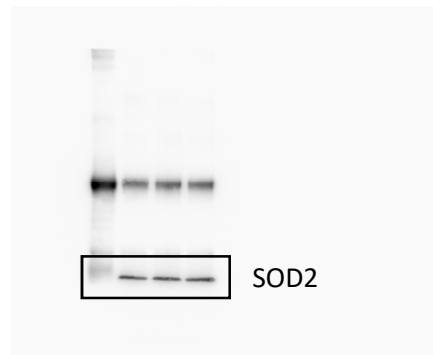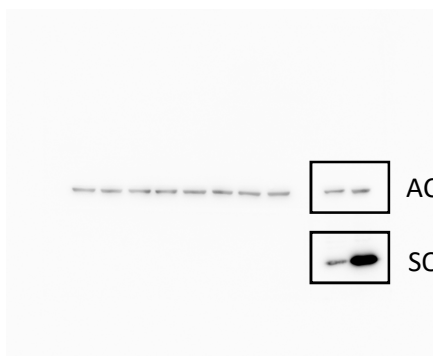

**Supplementary Fig. 4F-I**

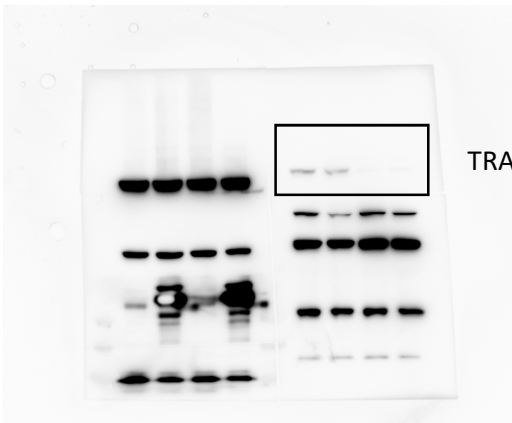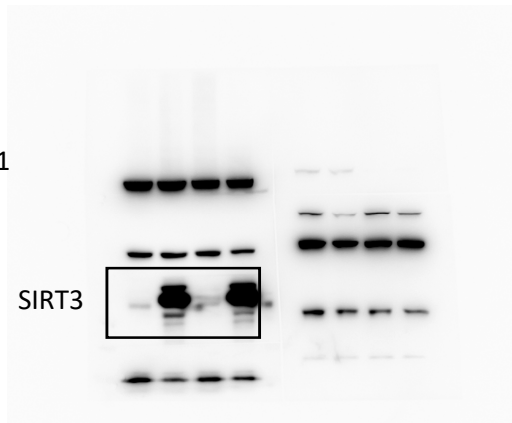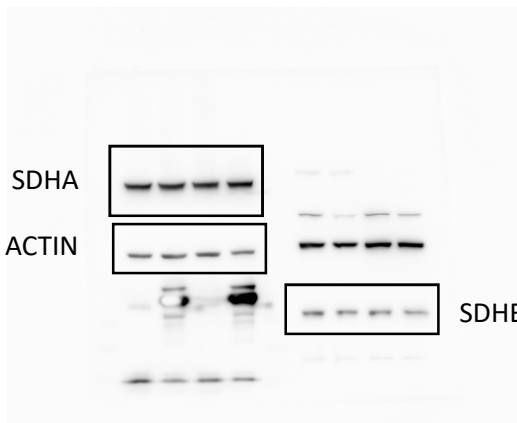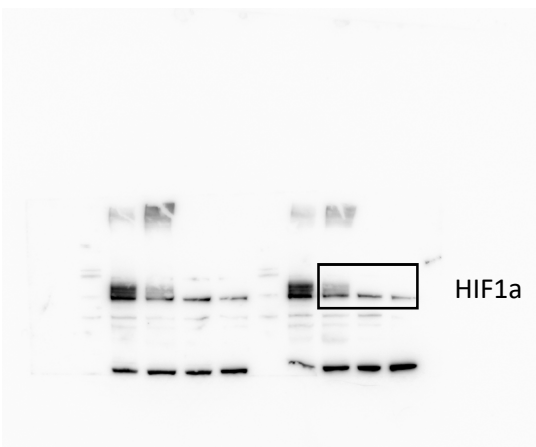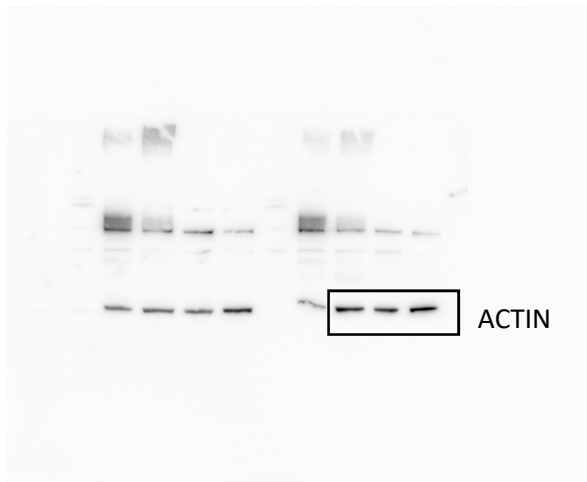

**Supplementary Fig. 5A, F**

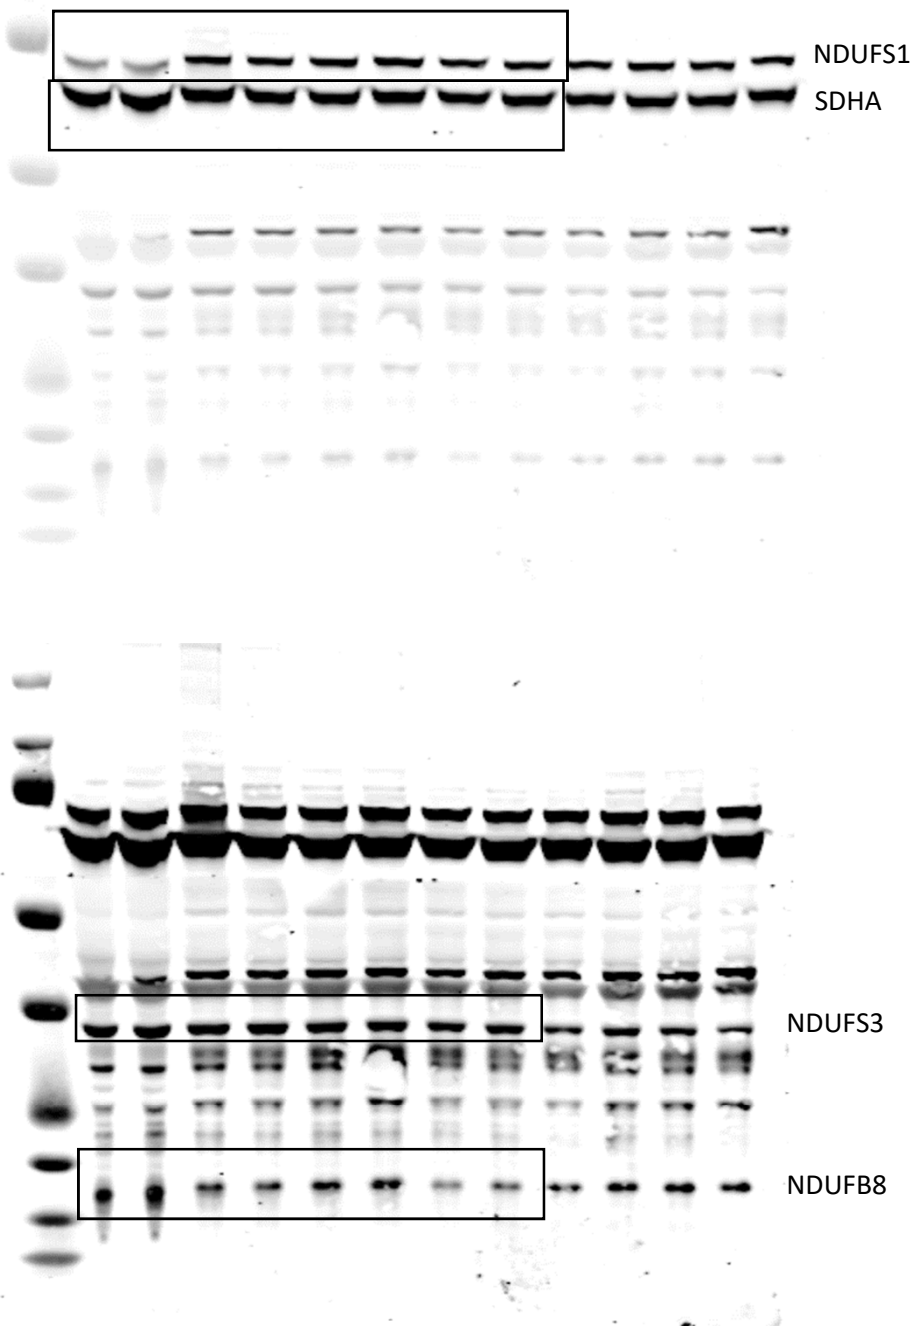

Supplementary Fig. 5E
